# Supplementary material
Source: publisher figshare collection journal article supplement (https://acs.figshare.com/ndownloader/files/5118676)

Supplementary materials for the manuscript “Synthesis of Aza-, Oxa-, and Thiabicyclo[3.1.0]hexane Heterocycles from a Common Synthetic Intermediate”  
Adam R. Renslo, Hongwu Gao, Priyadarshini Jaishankar, Revathy Venkatachalam, and Mikhail F. Gordeev

Preparation of compound 3

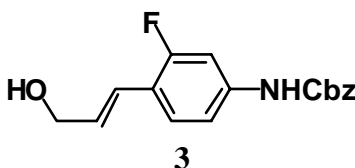

**Step 1.** Benzyl 3-fluoro-4-formylphenylcarbamate (2) (prepared previously using a different route; see Gordeev, M. F.; Luehr, G. L.; Patel, D. V.; Ni, Z.-J.; Gordon, E. U.S. Patent 6,239,152)

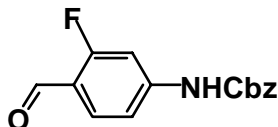

To an oven dried flask was added 4-bromo-2-fluorobenzaldehyde (50 g, 0.247 mol, 1.0 equiv.), benzyl carbamate (45 g, 0.297 mol, 1.2 equiv.), *rac*-BINAP (12.5 g, 0.020 mol, 0.08 equiv.), Cs<sub>2</sub>CO<sub>3</sub> (115 g, 0.353 mol, 1.42 equiv.) and Pd<sub>2</sub>(dba)<sub>3</sub> (9.15 g, 0.01 mol, 0.04 equiv.). The flask was evacuated and refilled with nitrogen. Anhydrous toluene (500 mL) was transferred into the flask by cannula. The resulting suspension was stirred at 95<sup>0</sup>-100<sup>0</sup>C for 24 hours and then cooled to room temperature. The reaction mixture was diluted with NH<sub>4</sub>Cl aqueous (1000 mL) and extracted with EtOAc (3x300 mL). The combined organic layers were washed with brine, dried (Na<sub>2</sub>SO<sub>4</sub>), filtered, and evaporated to dryness. The residue was purified by column chromatography on silica gel, eluting with a gradient increasing in polarity from 0 to 20% ethyl acetate in hexane. Relevant fractions were combined to provide.

Yield 44.7 g (66%)

HPLC (SYMMETRY C<sub>18</sub> 3.5  $\mu$ M, 4.6 x 30 mm column; gradient elution 2%-98% MeCN with 0.1% TFA over 5 min; 2 mL/min rate): retention time = 2.87 min

<sup>1</sup>H NMR (300 MHz, CDCl<sub>3</sub>): 5.23 (s, 2H), 6.98 (bs, 1H), 7.02 (d, *J* = 8.4 Hz, 1H), 7.40 (bs, 5H), 7.57 (d, *J* = 12.6 Hz, 1H), 7.80 (t, *J* = 7.8 Hz, 1H), 10.23 (s, 1H)

**Step 2. Methyl (2E)-3-(4-[(benzyloxy)carbonyl]amino)-2-fluorophenyl)acrylate**

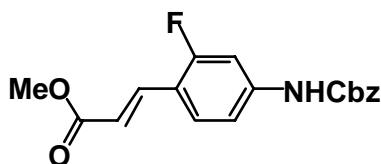

Sodium hydride (7.2 g of a 60% dispersion, 0.188 mol) was placed in a flask, rinsed three times with hexane and the flask evacuated and filled with nitrogen. The resulting solid was suspended in DMF (140 mL) and cooled to 0 °C. Trimethyl phosphonoacetate (30.7 mL, 0.190 mol) was added dropwise to this suspension to produce a clear homogeneous solution. After stirring for another 20 minutes at 0 °C, a solution of benzyl 3-fluoro-4-formylphenylcarbamate (**2**) (48 g, 0.176 mol) in DMF (140 mL) was added dropwise. The resulting orange suspension was allowed to warm slowly to room temperature and stirred for 16 hours. The reaction mixture was poured into 0.5 N HCl (1.5 L) and extracted with three 300 mL portions of dichloromethane. Combined organic phases were washed with saturated NaHCO<sub>3</sub>, twice with H<sub>2</sub>O, brine, and dried (Na<sub>2</sub>SO<sub>4</sub>). Upon concentration of the solution on a rotary evaporator, the product precipitated from solution. The solids were collected on a filter (providing 33.4 g) and the filtrate was concentrated to afford additional solids that were washed with ether (an additional 8.4 g obtained).

Yield 41.8 g (72%)

<sup>1</sup>H NMR (300 MHz, d<sub>6</sub>-DMSO): 3.71 (s, 3H), 5.17 (s, 2H), 6.55 (dd, *J* = 16, 1 Hz, 1H), 7.26 (d, *J* = 9 Hz, 1H), 7.35-7.50 (m, 6H), 7.63 (d, *J* = 16 Hz, 1H), 7.79 (t, *J* = 9 Hz, 1H), 10.3 (bs, 1H)

mp = 157-158 °C

**Step 3. Benzyl 3-fluoro-4-[(1E)-3-hydroxyprop-1-enyl]phenylcarbamate (**3**)**

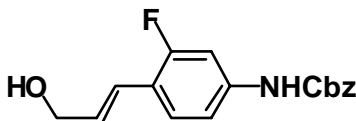

A THF solution of diisobutylaluminum hydride (522 mL of a 1.0 M solution, 522 mmol) was added to a cooled (-78 °C) solution of methyl (2E)-3-(4-[(benzyloxy)carbonyl]amino)-2-fluorophenyl)acrylate (43 g, 130 mmol) in THF (900 mL). After stirring for one hour at -78 °C, additional diisobutylaluminum hydride solution was added (140 mL of a 1.0 M solution, 140 mmol). After another 30 minutes, aqueous citric acid and ethyl acetate were added and the mixture allowed to warm slowly to room temperature. The layers were separated and the aqueous phase extracted with more ethyl acetate. Combined organic phases were washed with water, brine and, dried (MgSO<sub>4</sub>), filtered, and concentrated to afford a red oil. This crude residue was purified by column chromatography (0-40% ethyl acetate-hexane) to provide **3** as a yellow solid.

Yield 36 g (92%)

ESI-MS (m/z): [M+Na]<sup>+</sup> = 324

<sup>1</sup>H NMR (300 MHz, CDCl<sub>3</sub>): 1.43 (t, *J* = 6 Hz, 1H), 4.33 (t, *J* = 6 Hz, 2H), 5.28 (s, 2H), 6.37 (dt, *J* = 15, 6 Hz, 1H), 6.69 (d, *J* = 16 Hz, 1H), 6.70 (s, 1H), 6.99 (d, *J* = 9 Hz, 1H), 7.20-7.39 (m, 7H)

<sup>13</sup>C NMR (75 MHz, *d*<sub>6</sub>-DMSO): 61.5, 66.0, 104.8 (*J*<sub>C-F</sub> = 27 Hz), 114.0, 118.1 (*J*<sub>C-F</sub> = 12 Hz), 119.8 (*J*<sub>C-F</sub> = 3 Hz), 127.4 (*J*<sub>C-F</sub> = 5 Hz), 127.9, 128.0, 128.3, 131.7 (*J*<sub>C-F</sub> = 4 Hz), 136.2, 139.4 (*J*<sub>C-F</sub> = 11 Hz), 153.0, 159.2 (*J*<sub>C-F</sub> = 243 Hz)

mp = 105-106 °C

#### Preparation of intermediate 4

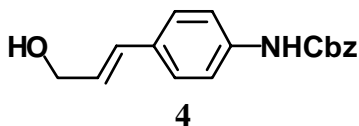

#### Step 1. benzyl 4-formylphenylcarbamate

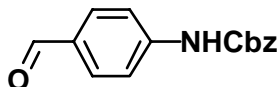

Benzyl 4-bromophenylcarbamate (20 g, 65.3 mmol) was dissolved in anhydrous THF (440 mL) and cooled to -78 °C. A *n*-BuLi solution (55 mL, 137.2 mmol) was added dropwise and the reaction mixture stirred for 0.5 h at -78 °C. To this mixture, DMF (7.6 mL) was added dropwise and the reaction mixture allowed to warm to room temperature over a period of 5 h. The reaction mixture was quenched with 1 N HCl, concentrated to remove THF, and diluted with additional water. The mixture was extracted with three portions of ethyl acetate. The combined organic phases were washed with H<sub>2</sub>O, brine, and dried (MgSO<sub>4</sub>), filtered, and concentrated. Trituration of the residue with hexanes and then with 20 % ethyl acetate in hexanes afforded the title compound as a yellow solid that was used in the next step without further purification.

Yield 8.75 g (52%)

#### Step 2. methyl (2E)-3-(4-[[[(benzyloxy)carbonyl]amino}phenyl)acrylate

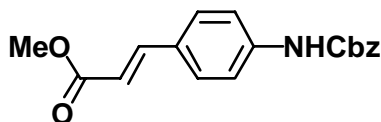

Sodium hydride (0.36 g of a 60% dispersion, 9.0 mmol) was placed in a flask, rinsed three times with hexane and the flask evacuated and filled with nitrogen. The resulting solid was suspended in DMF (7 mL) and cooled to 0 °C. Trimethyl phosphonoacetate (1.53 mL, 9.46 mmol) was added dropwise to this suspension to give a

clear homogeneous solution. After stirring for another 20 minutes at 0 °C, a solution of benzyl 4-formylphenyl-carbamate (2.3 g, 9.0 mmol) in DMF (7 mL) was added dropwise. The resulting orange suspension was allowed to warm slowly to room temperature and stirred for 15 h. The reaction mixture was poured into 0.5 N HCl and extracted with three portions of dichloromethane. Combined organic phases were washed with saturated NaHCO<sub>3</sub>, H<sub>2</sub>O, brine, and dried (MgSO<sub>4</sub>) filtered and concentrated. Purification by silica gel column chromatography (gradient 0-30% EtOAc in hexanes) provided the title compound.

Yield 2.5 g (89%)

<sup>1</sup>H NMR (300 MHz, CDCl<sub>3</sub>): 3.79(s, 3H), 5.21 (s, 2H), 6.33-6.38 (d, *J* = 16 Hz, 1H), 6.78 (s, 1H), 7.31-7.46 (m, 9H), 7.61-7.66 (d, *J* = 16 Hz, 1H)

**Step 3. benzyl 4-[(1E)-3-hydroxyprop-1-enyl]phenylcarbamate (4)**

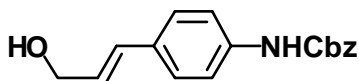

A THF solution of LiAlH<sub>4</sub> (6.75 mL of a 1.0 M solution, 6.75 mmol) was added to a cooled (-78 °C) solution of methyl (2E)-3-(4-[[[(benzyloxy)carbonyl] amino}phenyl] acrylate (2.1 g, 6.75 mmol) in THF (34 mL). The solution was allowed to warm slowly to -20 °C and maintained at that temperature for 2 hours. The reaction mixture was quenched by slow addition of saturated NH<sub>4</sub>Cl and then treated with dilute citric acid. The resulting solution was stirred for 15 minutes and then extracted with three portions of ethyl acetate. The combined organic phases were washed with H<sub>2</sub>O, brine and dried (MgSO<sub>4</sub>), filtered and concentrated to afford an oil. The crude residue was purified by column chromatography (20-50% ethyl acetate-hexane) to provide **4** as a yellow solid.

Yield 1.0 g (52%)

ESI-MS (*m/z*): [M-H]<sup>-</sup> = 282

<sup>1</sup>H NMR (300 MHz, CDCl<sub>3</sub>): 4.28-4.30 (d, *J* = 6 Hz, 2H), 5.18 (s, 2H), 6.22-6.31 (m, 1H), 6.52-6.57 (d, *J* = 16 Hz, 1H), 6.64 (s, 1H), 7.32-7.40 (m, 9H)

$^{13}\text{C}$  NMR (75 MHz,  $d_6$ -DMSO): 61.5, 65.7, 118.1, 126.4, 127.9, 127.95, 128.0, 128.3, 128.9, 131.1, 136.4, 138.0, 153.1

Preparation of intermediate 5.

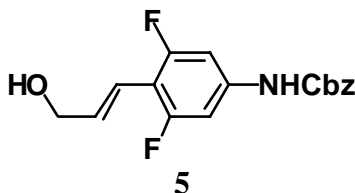

Step 1. 4-Amino-2,6-difluoro-benzaldehyde

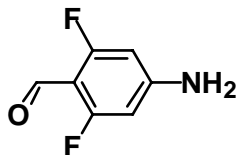

A solution of 3,5-difluoroaniline (12.9 g, 0.1 mol) in anhydrous THF (400 mL) was cooled at  $-78^{\circ}\text{C}$  and treated with *n*-butyllithium (2.5 M in hexane, 84 mL, 0.21 mol, 2.1 equiv.) dropwise over 25 min. After stirring at  $-78^{\circ}\text{C}$  for 30 min, trimethylsilyl chloride (1.0 M in THF, 210 mL, 0.21 mol, 2.1 equiv.) was added dropwise over 30 min. The temperature was allowed to rise to  $23^{\circ}\text{C}$  and the mixture stirred overnight. After re-cooling to  $-78^{\circ}\text{C}$ , additional *n*-butyllithium (2.5 M in hexane, 44 mL, 0.11 mol, 1.1 equiv.) was added dropwise over 20 min, and the reaction mixture stirred at that temperature for 5 hours. Then, DMF (11.6 mL, 0.15 mol, 1.5 equiv.) was added dropwise over 20 min. The temperature was allowed to rise to  $23^{\circ}\text{C}$  and stirred overnight. The mixture was cooled in an ice-bath and acidified to pH=1 by slow addition of aqueous HCl (1.0 M, 220 mL, 0.22 mol). After stirring for 15 min, the mixture was extracted with ethyl acetate (3x200 mL). The combined organic layers were washed (brine), dried ( $\text{Na}_2\text{SO}_4$ ), filtered and evaporated to dryness. The residue was purified by chromatography on a silica gel column, eluting with a gradient increasing in polarity from 0 to 50% ethyl acetate in hexane. Relevant fractions were combined and concentrated to afford the title compound.

Yield 8.5 g (55%)

HPLC (SYMMETRY C<sub>18</sub> 3.5  $\mu$ M, 4.6 x 30 mm column; gradient elution 2%-98% MeCN with 0.1% TFA over 5 min; 2 mL/min rate): retention time = 1.58 min

<sup>1</sup>H NMR (300 MHz, DMSO-d<sub>6</sub>): 6.19 (d, *J* = 12.3 Hz, 2H), 6.93 (bs, 2H), 9.83 (s, 1H)

**Step 2. Ethyl (2E)-3-[4-amino-2,6-difluorophenyl]acrylate**

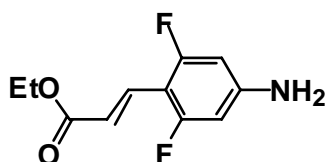

To a solid mixture of 4-amino-2,6-difluoro-benzaldehyde (6.5 g, 41.4 mmol, 1.0 equiv.) and (carbethoxymethylene)triphenylphosphorane (18.75 g, 53.8 mmol, 1.3 equiv.) at room temperature was added ethanol (97 mL). After stirring for 25 min at 23<sup>0</sup>C, the reaction mixture was concentrated, absorbed to silica gel and purified by flash column chromatography eluting with a gradient increasing in polarity from 0 to 30% ethyl acetate in hexane. Relevant fractions were combined and concentrated to provide the title compound.

Yield 9.0 g (96%)

HPLC (SYMMETRY C<sub>18</sub> 3.5  $\mu$ M, 4.6 x 30 mm column; gradient elution 2%-98% MeCN with 0.1% TFA over 5 min; 2 mL/min rate): retention time = 2.74 min

<sup>1</sup>H NMR (300 MHz, CDCl<sub>3</sub>): 1.32 (t, *J* = 7.2 Hz, 3H), 4.14 (bs, 2H), 4.24 (q, *J* = 7.2 Hz, 2H), 6.19 (d, *J* = 10.8 Hz, 2H), 6.50 (d, *J* = 16.2 Hz, 1H), 7.68 (d, *J* = 16.2 Hz, 1H)

**Step 3. Ethyl (2E)-3-(4-[[[(benzyloxy)carbonyl]amino]-2,6-difluorophenyl]acrylate**

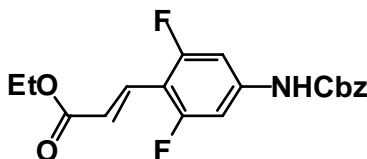

A solution of ethyl (2E)-3-[4-amino-2,6-difluorophenyl]acrylate (1.7 g, 7.5 mmol) in CH<sub>2</sub>Cl<sub>2</sub> (100 mL) and pyridine (1.2 mL, 14.8 mmol, 2.0 equiv) was cooled in an ice-bath. The solution was then treated with benzyl chloroformate (1.3 mL, 9.1 mmol, 1.2 eq) dropwise and the solution stirred at 23<sup>0</sup>C for 17 hours. The reaction mixture was then diluted with more CH<sub>2</sub>Cl<sub>2</sub> and the organic phase was washed with water, brine, and dried (Na<sub>2</sub>SO<sub>4</sub>), filtered, and concentrated. The residue was purified by chromatography on a silica gel column, eluting with a gradient increasing in polarity from 0 to 20% ethyl acetate in hexane. Relevant fractions were combined and concentrated to afford the title compound.

Yield 2.59 g (96%)

HPLC (SYMMETRY C<sub>18</sub> 3.5 μM, 4.6 x 30 mm column; gradient elution 2%-98% MeCN with 0.1% TFA over 5 min; 2 mL/min rate): retention time = 3.55 min

<sup>1</sup>H NMR (300 MHz, CDCl<sub>3</sub>): 1.33 (t, *J*=7.2 Hz, 3H), 4.26 (q, *J* = 7.2 Hz, 2H), 5.21 (s, 2H), 6.62 (d, *J* = 16.5 Hz, 1H), 6.90 (bs, 1H), 7.07 (d, *J* = 10.8 Hz, 2H), 7.40 (bs, 5H), 7.70 (d, *J* = 16.5 Hz, 1H)



**Step 4. Benzyl 2,6-difluoro-4-[(1E)-3-hydroxyprop-1-enyl]phenylcarbamate (5)**

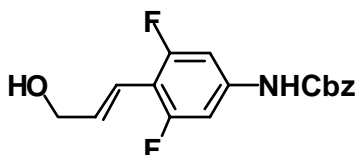

A solution of diisobutylaluminum hydride (8.3 mL, of 1.0 M hexane solution, 8.3 mmol, 3.0 equiv.) was added to a cooled (-78<sup>0</sup>C) solution of ethyl (2E)-3-(4-[(benzyloxy)carbonyl]amino)-2,6-difluorophenyl)acrylate (0.97 g, 2.69 mmol) in THF (20 mL) over 10 min and the cooling bath allowed to warm to -50<sup>0</sup>C. After stirring at -50<sup>0</sup>C for 1h, the reaction mixture was quenched by the addition of saturated aqueous NH<sub>4</sub>Cl and then treated with aqueous citric acid (100 mL of a 10% solution). The resulting mixture was stirred for 15 min and then extracted with ethyl acetate (3x70 mL). Combined organic layers were washed with brine, dried (Na<sub>2</sub>SO<sub>4</sub>), filtered and evaporated to dryness. The residue was purified by chromatography on a silica gel column, eluting with a gradient increasing in polarity from 0 to 30% ethyl acetate in hexane. Relevant fractions were combined and concentrated to provide **5**.

Yield 0.69 g (81%)

ESI-MS (m/z): [M-H]<sup>-</sup> = 318

HPLC (SYMMETRY C<sub>18</sub> 3.5 μM, 4.6 x 30 mm column; gradient elution 2%-98% MeCN with 0.1% TFA over 5 min; 2 mL/min rate): retention time = 2.86 min

<sup>1</sup>H NMR (300 MHz, CDCl<sub>3</sub>): 1.54 (t, *J* = 5.4 Hz, 1H), 4.34 (bs, 2H), 5.21 (s, 2H), 6.58 (m, 2H), 6.77 (bs, 1H), 7.00 (d, *J* = 10.2 Hz, 2H), 7.39 (bs, 5H)

<sup>13</sup>C NMR (75 MHz, *d*<sub>6</sub>-DMSO): 61.6, 66.2, 101.1 (*J*<sub>C-F</sub> = 30 Hz), 107.5, 113.8, 128.0, 128.1, 128.3, 136.0 (*J*<sub>C-F</sub> = 9 Hz), 136.2, 139.1 (t, *J*<sub>C-F</sub> = 15 Hz), 152.9, 159.9 (dd, *J*<sub>C-F</sub> = 244, 11 Hz)

(6) (2E)-3-(4-[[[(benzyloxy)carbonyl]amino]-2-fluorophenyl]prop-2-enyl diazoacetate

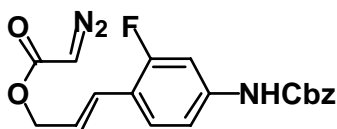

**6**

To a suspension of glyoxylic acid *p*-toluenesulfonylhydrazone (24 g, 0.10 mol, prepared as described by C. J. Blankley, F. J. Sauter and H. O. House, *Organic Syntheses*, Coll. Vol. V, p. 258; John Wiley, New York (1973)) in CH<sub>2</sub>Cl<sub>2</sub> (600 mL) at 23<sup>0</sup>C was added commercially available 1-chloro-*N,N*,2-trimethyl-1-propenylamine (15 mL, 0.114 mol, 1.14 equiv.) over 5 min. The reaction mixture was stirred at the same temperature for 40 min. The reaction mixture was then cooled to 0 °C and benzyl 3-fluoro-4-[(1E)-3-hydroxyprop-1-enyl]phenylcarbamate (23 g, 0.077 mol) was added in one portion followed by the addition of *N,N*-dimethylaniline (12 mL, 0.095 mol). After 30 minutes, triethylamine (53 mL, 0.385 mol) was added and the mixture stirred for 30 minutes at 0 °C and 15 minutes at room temperature. The reaction mixture was then concentrated to a volume of about 100 mL and 500 mL of water added. The mixture was extracted with two portions of diethyl ether and the combined organic solutions washed with saturated NaHCO<sub>3</sub>, brine, and dried (MgSO<sub>4</sub>), filtered and concentrated. Purification by column chromatography (0-25% ethyl acetate-hexane) provided **6** as a yellow solid.

Yield 23.8 g (84%)

<sup>1</sup>H NMR (300 MHz, CDCl<sub>3</sub>): 4.80 (s, 2H), 4.83 (s, 1H), 5.21 (s, 2H), 6.29 (dt, *J* = 16, 6 Hz, 1H), 6.72 (d, *J* = 16 Hz, 1H), 6.73 (s, 1H), 6.98 (d, *J* = 8 Hz, 1H), 7.25-7.40 (m, 7H)

<sup>13</sup>C NMR (75 MHz, CDCl<sub>3</sub>): 46.3, 65.5, 67.2, 106.0 (*J*<sub>C-F</sub> = 27 Hz), 113.9, 118.8 (*J*<sub>C-F</sub> = 13 Hz), 124.2 (*J*<sub>C-F</sub> = 5 Hz), 126.3 (*J*<sub>C-F</sub> = 3 Hz), 127.8 (*J*<sub>C-F</sub> = 5 Hz), 128.3, 128.4, 128.6, 135.7, 138.9 (*J*<sub>C-F</sub> = 11 Hz), 152.9, 160.5 (*J*<sub>C-F</sub> = 248 Hz), 166.6

mp = 93-96 °C

(7) (racemic) benzyl 3-fluoro-4-[*rac*-(1 $\alpha$ ,5 $\alpha$ ,6 $\beta$ )-2-oxo-3-oxabicyclo[3.1.0]hex-6-yl]phenylcarbamate

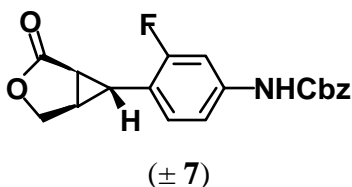

A solution of (2E)-3-(4-{[(benzyloxy)carbonyl]amino}-2-fluorophenyl)prop-2-enyl diazoacetate (13.9 g, 37.5 mmol) in 1,2-dichloroethane (150 mL) was added via syringe pump over 14 h to a refluxing solution of bis-(*N*-*t*-butylsalicylaldiminato)copper(II) (0.82 g, 1.9 mmol, prepared as described by R. G. Charles, *J. Org. Chem.* **1957**, 22, 677) in 1.5 L of toluene. After the addition was complete, the reaction mixture was heated another hour at reflux, then cooled, filtered and concentrated to an oil. The crude residue was purified by column chromatography (0-50% ethyl acetate-hexanes) to provide **7** as a yellow solid.

Yield 9.3 g (73%)

ESI-MS (*m/z*): [M+Na]<sup>+</sup> = 364

<sup>1</sup>H NMR (300 MHz, CDCl<sub>3</sub>): 2.33-2.39 (m, 2H), 2.49-2.53 (m, 1H), 4.4 (m, 2H), 5.18 (s, 2H), 6.82 (t, *J* = 9 Hz, 1H), 7.0 (d, *J* = 8 Hz, 1H), 7.01 (s, 1H), 7.25-7.38 (m, 6H)

<sup>13</sup>C NMR (300 MHz, CDCl<sub>3</sub>): 23.3 (*J*<sub>C-F</sub> = 4 Hz), 25.1 (*J*<sub>C-F</sub> = 2 Hz), 25.8, 67.3, 69.7, 106.1 (*J*<sub>C-F</sub> = 27 Hz), 114.0, 118.6 (*J*<sub>C-F</sub> = 14 Hz), 127.2 (*J*<sub>C-F</sub> = 5 Hz), 128.2, 128.4, 128.5, 135.5, 138.3 (*J*<sub>C-F</sub> = 11 Hz), 152.8, 161.1 (*J*<sub>C-F</sub> = 244 Hz), 174.8

mp = 141-142 °C

(8) Benzyl 4-[(1 $\alpha$ ,5 $\alpha$ ,6 $\beta$ )-2,3-bis(hydroxymethyl)cyclopropyl]-3-fluorophenylcarbamate

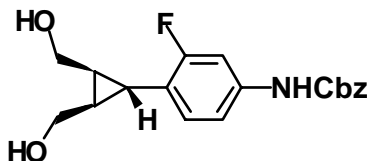

**8**

Solid LiBH<sub>4</sub> (2.6 g, 119 mmol) was added in one portion to a solution of benzyl 3-fluoro-4-[*rac*-(1 $\alpha$ ,5 $\alpha$ ,6 $\beta$ )-2-oxo-3-oxabicyclo[3.1.0]hex-6-yl]phenylcarbamate (8.3 g, 24.3 mmol) in THF (170 mL) cooled at 0 °C. The solution was allowed to warm to room temperature and stirred for 14 hours. The solution was then re-cooled to 0 °C and quenched by the addition of aqueous citric acid solution. The solution was extracted with three portions of ethyl acetate. The combined organic phases were then washed with water, brine, and dried (MgSO<sub>4</sub>), filtered and concentrated. Purification by column chromatography (20-75% ethyl acetate-hexanes) provided **8** as a white foam.

Yield 6.4 g (81%)

ESI-MS (m/z): [M+Na]<sup>+</sup> = 368

<sup>1</sup>H NMR (300 MHz, CDCl<sub>3</sub>): 1.65-1.72 (m, 2H), 1.90 (t, *J* = 5 Hz, 1H), 2.72 (bs, 2H), 3.48 (m, 2H), 4.23 (m, 2H), 5.19 (s, 2H), 6.75 (s, 1H), 6.82 (t, *J* = 8 Hz, 1H), 6.93 (dd, *J* = 9, 2 Hz, 1H), 7.30-7.41 (m, 6H)

<sup>13</sup>C NMR (300 MHz, *d*<sub>6</sub>-DMSO): 19.2 (*J*<sub>C-F</sub> = 4 Hz), 28.1, 60.0, 65.9, 104.5 (*J*<sub>C-F</sub> = 27 Hz), 113.8, 122.7 (*J*<sub>C-F</sub> = 15 Hz), 126.5 (*J*<sub>C-F</sub> = 6 Hz), 127.9, 128.0, 128.3, 136.3, 137.7 (*J*<sub>C-F</sub> = 11 Hz), 153.0, 160.2 (*J*<sub>C-F</sub> = 239 Hz)

(13) benzyl 3-fluoro-4-[(1 $\alpha$ ,5 $\alpha$ ,6 $\beta$ )-3-thiabicyclo[3.1.0]hex-6-yl]phenylcarbamate

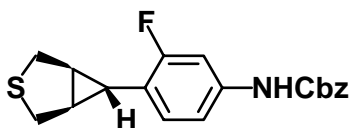

**13**

Methanesulfonic anhydride (1.51 g, 8.7 mmol) was added to a cooled (0°C) solution of benzyl 4-[(1 $\alpha$ ,5 $\alpha$ ,6 $\beta$ )-2,3-bis(hydroxymethyl)cyclopropyl]-3-fluorophenylcarbamate (1.0 g, 2.9 mmol) in dichloromethane (36 mL) and triethylamine (1.61 mL, 11.6 mmol). The solution was allowed to warm to room temperature and stirred for 2 h. The solution was then diluted with 30 mL of dichloromethane and washed with two portions of saturated NaHCO<sub>3</sub>, brine, and dried (MgSO<sub>4</sub>). The crude product was used directly in the next reaction or first passed through a short pad of SiO<sub>2</sub> (eluting with ethyl acetate) to provide 4-[(1 $\alpha$ ,5 $\alpha$ ,6 $\beta$ )-2,3-bis(methanesulfonyloxymethyl)cyclopropyl]-3-fluorophenylcarbamate as a white solid.

Sodium sulfide (0.65 g, 8.4 mmol) was added to a solution of benzyl 4-[(1 $\alpha$ ,5 $\alpha$ ,6 $\beta$ )-2,3-bis(methanesulfonyloxymethyl)cyclopropyl]-3-fluorophenylcarbamate (1.4 g, 2.8 mmol) in DMSO (5.5 mL). The reaction mixture was stirred at room temperature for 2 h. The resulting yellow suspension was then diluted with 30 mL of H<sub>2</sub>O and extracted with three portions of diethyl ether. The combined organic extracts were dried (MgSO<sub>4</sub>), filtered and concentrated to provide **13** as a white solid.

Yield 0.87 g (91%)

ESI-MS (m/z): [M+Na]<sup>+</sup> = 366

<sup>1</sup>H NMR (300 MHz, CDCl<sub>3</sub>): 1.91 (m, 2H), 2.44 (m, 1H), 3.09 (d, *J* = 11 Hz, 2H), 3.18 (d, *J* = 11 Hz, 2H), 5.20 (s, 2H), 6.61 (s, 1H), 6.91 (t, *J* = 8 Hz, 1H), 6.94 (d, *J* = 8 Hz, 1H), 7.19-7.40 (m, 6H)

mp = 121-122 °C

(16) Benzyl 3-fluoro-4-[(1 $\alpha$ ,5 $\alpha$ ,6 $\beta$ )-3-(4-methoxybenzyl)-3-azabicyclo[3.1.0]hex-6-yl]phenylcarbamate

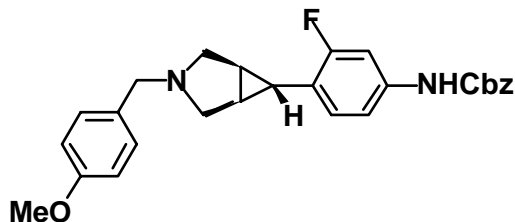

**16**

Methanesulfonic anhydride (9.85 g, 56.5 mmol) was added to a cooled (0°C) solution of benzyl 4-[(1 $\alpha$ ,5 $\alpha$ ,6 $\beta$ )-2,3-bis(hydroxymethyl)cyclopropyl]-3-fluorophenylcarbamate (6.5 g, 18.8 mmol) in dichloromethane (220 mL) and triethylamine (10.6 mL, 76 mmol). The solution was allowed to warm to room temperature and stirred for 1 h. The solution was then diluted with 250 mL of dichloromethane and washed with two portions of saturated NaHCO<sub>3</sub>, brine, and dried (Na<sub>2</sub>SO<sub>4</sub>), filtered, and concentrated. The crude product used directly in the next reaction or first passed through a short pad of SiO<sub>2</sub> (eluting with ethyl acetate) to provide the bis-mesylate intermediate as a white solid.

Crude benzyl 4-[(1 $\alpha$ ,5 $\alpha$ ,6 $\beta$ )-2,3-bis(methanesulfonyloxymethyl)cyclopropyl]-3-fluorophenylcarbamate (18.8 mmol) was dissolved in 4-methoxybenzylamine (50 g, 360 mmol) and stirred at room temperature for 16 h. The resulting solution was then diluted with ethyl acetate and washed with 2.5% NaHCO<sub>3</sub>, dilute aqueous HCl (360 mL of a 1 N solution diluted to 1.0 L with H<sub>2</sub>O), again with 2.5% NaHCO<sub>3</sub>, brine, and dried (MgSO<sub>4</sub>), filtered and concentrated. The crude product was purified by silica gel column chromatography (gradient 0-30% ethyl acetate-hexane – 1% Et<sub>3</sub>N) to provide **16** as a white solid.

Yield 7.7 g (92% over 2 steps)

ESI-MS (m/z): [M+H]<sup>+</sup> = 447

<sup>1</sup>H NMR (300 MHz, CDCl<sub>3</sub>): 1.65 (bs, 2H), 2.44 (d, *J* = 9 Hz, 2H), 2.47 (m, 1H), 3.09 (d, *J* = 9 Hz, 2H), 3.58 (s, 2H), 3.80 (s, 3H), 5.19 (s, 2H), 6.60 (bs, 1H), 6.77-6.93 (m, 4H), 7.21-7.41 (m, 8H)

$^{13}\text{C}$  NMR (75 MHz,  $\text{CDCl}_3$ ): 16.8 ( $J_{\text{C-F}} = 4$  Hz), 25.7, 54.6, 55.2, 58.2, 67.0, 106.0 ( $J_{\text{C-F}} = 26$  Hz), 113.5, 114.0, 124.4 ( $J_{\text{C-F}} = 15$  Hz), 126.7 ( $J_{\text{C-F}} = 6$  Hz), 128.25, 128.35, 128.6, 129.6, 131.4, 135.8, 136.2 ( $J_{\text{C-F}} = 11$  Hz), 153.1, 158.4, 161.2 ( $J_{\text{C-F}} = 161$  Hz)

**(19)** benzyl 3-fluoro-4-[(1 $\alpha$ ,5 $\alpha$ ,6 $\beta$ )-3-oxabicyclo[3.1.0]hex-6-yl]phenylcarbamate

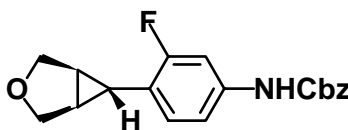

**19**

A solution of benzyl 4-[(1 $\alpha$ ,5 $\alpha$ ,6 $\beta$ )-2,3-bis(hydroxymethyl)cyclopropyl]-3-fluorophenylcarbamate (0.18 g, 0.52 mmol,) in THF (5 mL) was cooled to  $-50$  °C. An *n*-BuLi solution (0.72 mL, 1.14 mmol) was added and the resulting yellow suspension was stirred for 10 min at  $-50$  °C and then treated with methanesulfonyl chloride (0.088 mL, 1.14 mmol). This produced a homogeneous solution that was stirred for another 10 min and then treated with more *n*-BuLi (0.36 mL, 0.57 mmol). The solution was allowed to warm to  $-30$  °C over one hour and then quenched by the addition of water and dilute  $\text{NaHCO}_3$ . The solution was concentrated *in vacuo* to remove THF and the resulting aqueous solution was then extracted with ethyl acetate three times. The combined organic phases were washed with brine and dried ( $\text{MgSO}_4$ ), filtered and concentrated. The crude residue was purified by column chromatography (0-30% ethyl acetate/hexane) to provide **19**.

Yield 73 mg (43%)

ESI-MS ( $m/z$ ):  $[\text{M}+\text{H}]^+ = 328$

$^1\text{H}$  NMR (300 MHz,  $\text{CDCl}_3$ ): 1.89 (m, 2H), 1.98 (t,  $J = 4$  Hz, 1H), 3.80 (d,  $J = 8$  Hz, 2H), 4.02 (d,  $J = 8$  Hz, 2H), 5.20 (s, 2H), 6.63 (bs, 1H), 6.87 (t,  $J = 8$  Hz, 1H), 6.95 (d,  $J = 8$  Hz, 1H), 7.25 (d,  $J = 12$  Hz, 1H), 7.35-7.41 (m, 5H)

mp =  $118-119$  °C

(21) N-[(5S)-3-{4-[(1 $\alpha$ ,5 $\alpha$ ,6 $\beta$ )-3,3-dioxido-3-thiabicyclo[3.1.0]hex-6-yl]-3-fluorophenyl}-2-oxo-1,3-oxazolidin-5-yl)methyl]acetamide

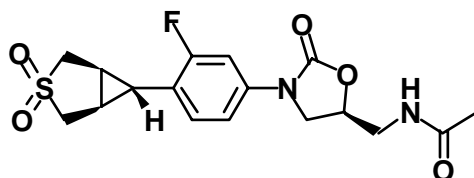

21

Lithium butoxide solution (3.0 mL of a 1.0 M THF solution, 3.0 mmol) was added to a cooled (0 °C) solution of benzyl 3-fluoro-4-[(1 $\alpha$ ,5 $\alpha$ ,6 $\beta$ )-3-thiabicyclo[3.1.0]hex-6-yl]phenylcarbamate (0.35 g, 1.0 mmol) in DMF (0.7 mL) and MeOH (0.081 mL, 2.0 mmol). Solid (*S*)-acetic acid 2-acetylamino-1-chloromethyl-ethyl ester (0.39 g, 2.0 mmol) was then added and the solution allowed to warm to room temperature and stirred for 20 h. Saturated aqueous ammonium chloride (2 mL) was added, along with 10 mL of H<sub>2</sub>O and 10 mL of brine. The solution was extracted with three portions of dichloromethane and the combined organic phases dried (MgSO<sub>4</sub>), filtered and concentrated. The crude residue was purified by column chromatography (0-3% MeOH- dichloromethane) to provide the sulfide intermediate N-[(5S)-3-{3-fluoro-4-[(1 $\alpha$ ,5 $\alpha$ ,6 $\beta$ )-3-thiabicyclo[3.1.0]hex-6-yl]phenyl}-2-oxo-1,3-oxazolidin-5-yl)methyl]acetamide (0.24 g, 68% yield).

Peracetic acid (0.18 mL of a 32% aqueous solution, 0.856 mmol) was added to a solution of N-[(5S)-3-{3-fluoro-4-[(1 $\alpha$ ,5 $\alpha$ ,6 $\beta$ )-3-thiabicyclo[3.1.0]hex-6-yl]phenyl}-2-oxo-1,3-oxazolidin-5-yl)methyl]acetamide (0.10 g, 0.285 mmol) in THF (9 mL) cooled at 0 °C. The reaction mixture was stirred for 2 h at room temperature, treated with more peracetic acid (0.050 mL) and stirred another 3 h. The reaction was quenched by the addition of saturated Na<sub>2</sub>S<sub>2</sub>O<sub>3</sub> (2 mL) and water (5 mL). The solution was concentrated to remove THF and the resulting aqueous solution extracted with three portions of ethyl acetate. Combined organic extracts were washed with dilute NaHCO<sub>3</sub>, brine, and dried



(MgSO<sub>4</sub>). The crude product was purified by column chromatography (0-4% MeOH-dichloromethane) to provide **21** as a foam.

Yield 0.089 g (82%)

ESI-MS (m/z): [M+Na] = 405

<sup>1</sup>H NMR (300 MHz, d<sub>6</sub>-DMSO): 1.82 (s, 3H), 2.10 (m, 2H), 2.33 (t, *J* = 4 Hz, 1H), 3.01 (d, *J* = 13 Hz, 2H), 3.33-3.41 (m, 2H), 3.59 (m, 2H), 3.71 (t, *J* = 7 Hz, 1H), 4.09 (t, *J* = 9 Hz, 1H), 4.71 (m, 1H), 7.12 (t, *J* = 8 Hz, 1H), 7.22 (d, *J* = 8 Hz, 1H), 7.47 (d, *J* = 13 Hz, 1H), 8.24 (t, *J* = 5 Hz, 1H)

**Representative procedures for removal of 4-methoxybenzyl (PMB) protection in azabicyclic systems.**

*N*-[(((5*S*)-3-{4-[(1*α*,5*α*,6*β*)-3-azabicyclo[3.1.0]hex-6-yl]-3-fluorophenyl}-2-oxo-1,3-oxazolidin-5-yl)methyl)acetamide

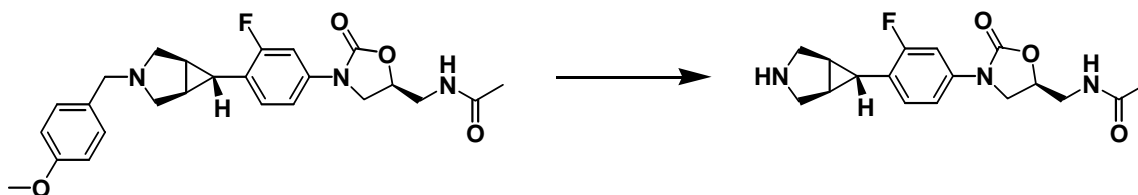

A solution of *N*-[(((5*S*)-3-{3-fluoro-4-[exo-(1*α*,5*α*,6*β*)-3-(4-methoxybenzyl)-3-azabicyclo[3.1.0]hex-6-yl]phenyl}-2-oxo-1,3-oxazolidin-5-yl)methyl)acetamide (0.087 g, 0.19 mmol) in 1:1 ethyl acetate-methanol (5 mL) was stirred under a hydrogen atmosphere in the presence of 20% Pd(OH)<sub>2</sub>/C (0.10 g) for 4 h and then filtered through celite. The filtrate was concentrated to provide *N*-[(((5*S*)-3-{4-[(1*α*,5*α*,6*β*)-3-azabicyclo[3.1.0]hex-6-yl]-3-fluorophenyl}-2-oxo-1,3-oxazolidin-5-yl)methyl)acetamide which could be used directly in subsequent reactions, or purified by column chromatography (0-6% MeOH-dichloromethane-1% Et<sub>3</sub>N).

Yield 0.055 g (86%)

ESI-MS (m/z): [M+H] = 334

<sup>1</sup>H NMR (300 MHz, CD<sub>3</sub>OD): 1.88 (m, 2H), 1.95 (s, 3H), 1.96 (m, 1H), 3.05 (d, *J* = 11 Hz, 2H), 3.22 (d, *J* = 11 Hz, 2H), 3.54 (d, *J* = 5 Hz, 2H), 3.78 (m, 1H), 4.11 (t, *J* = 9 Hz, 1H), 4.78 (m, 1H), 7.03 (t, *J* = 9 Hz, 1H), 7.17 (dd, *J* = 9, 2 Hz, 1H), 7.43 (dd, *J* = 13, 3 Hz, 1H)

*N*-[(((5*S*)-3-{4-[(1*α*,5*α*,6*β*)-3-azabicyclo[3.1.0]hex-6-yl]phenyl}-2-oxo-1,3-oxazolidin-5-yl)methyl]acetamide.

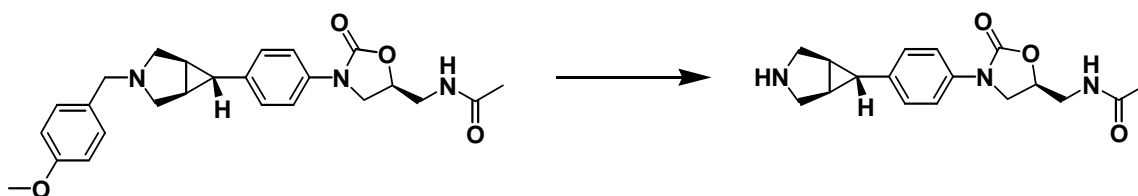

A solution of *N*-[(((5*S*)-3-{4-[(1*α*,5*α*,6*β*)-3-(4-methoxybenzyl)-3-azabicyclo[3.1.0]hex-6-yl]phenyl}-2-oxo-1,3-oxazolidin-5-yl)methyl]acetamide (0.11 g, 0.25 mmol) in dichloromethane (1.0 mL) and triethylamine (0.035 mL, 0.25 mmol) and stirred at 0 °C. To this, 1-chloroethyl chloroformate (0.055 mL, 0.5 mmol) was added and the reaction mixture stirred at 0 °C for 30 min. The reaction mixture was then concentrated, dissolved in methanol and heated at reflux for 45 min. The reaction mixture was then concentrated and triturated with diethyl ether to provide *N*-[(((5*S*)-3-{4-[(1*α*,5*α*,6*β*)-3-azabicyclo[3.1.0]hex-6-yl]phenyl}-2-oxo-1,3-oxazolidin-5-yl)methyl]acetamide hydrochloride as a yellow powder. This material was used directly in subsequent reactions without further purification.

Crude Yield 0.085 g (>95%)

ESI-MS (m/z): [M+H] = 316

451-51  
expi stidh

SAMPLE DEC. & VT  
date Aug 19 2003 dfrq 300.069  
solvent Aug 19 2003 dfrq 300.069  
expct/home/~dfrq 300.069  
chem2/sect/451/4~ dfrq 300.069  
gwn/Notebook 451/4~ dfrq 300.069  
51-51h.fid dfrq 300.069  
ACQUISITION 200  
sfrq 300.069  
in H1 w/tille ft  
at 1.898 proc  
su 1.738 fn not used  
fb 4500.1  
bs 2600 weff react  
tpwr 50 wbsd  
pw 7.0 wnt  
tq 1.000  
nt 128  
ct 32  
a-lock s  
gain not used  
FLAOS  
f1 n  
f2 n  
f3 n  
dp y  
DISPLAY  
sp -150.3  
vp 3600.8  
vs 85  
sc 0  
vc 25.0  
b2mm 14.40  
ls 9923.06  
rfi 748.8  
rfp 0  
th 8  
rms 100.000  
ph

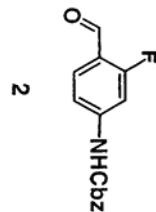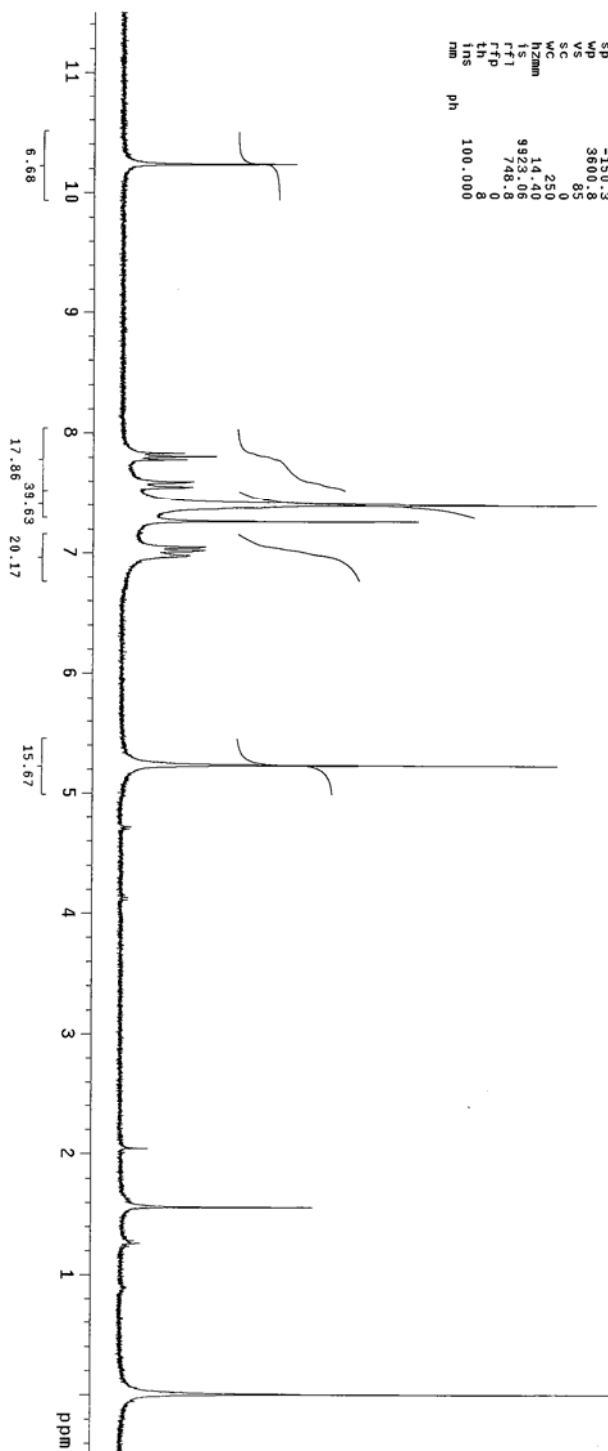

451-60

expt std1h

SAMPLE DEC. & VT  
 date Aug 26 2003 dfrq 300.069  
 solvent CDCl3 dn H1  
 file /export/home/~ dpr 30  
 chg /export/home/~ dpr 30  
 dmw/Notebook 451.4 dmm mn  
 51-60h-fid dmm c  
 ACQUISITION  
 sfrq 300.069 dmf PROCESSING 200  
 at 1.398 wtf1.0  
 ap 1.398 proc not used  
 sw 17884 fn  
 fd 4500.5 wctr react  
 fs 2800 wbs  
 twf 50 wbs  
 pw 7.0 wnt  
 d1 1.000  
 d2 1.000  
 d3 1.000  
 ct 36  
 alock s  
 gain not used  
 f1 n  
 f2 n  
 f3 n  
 in y  
 dp  
 DISPLAY  
 sp -150.2  
 wd 3600.2  
 vs 74  
 sc 0  
 wc 250  
 hzmm 14.250  
 is 5989.85  
 rft 748.8  
 rfp 0  
 ln 5  
 nm 100.000  
 ph

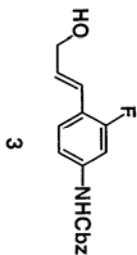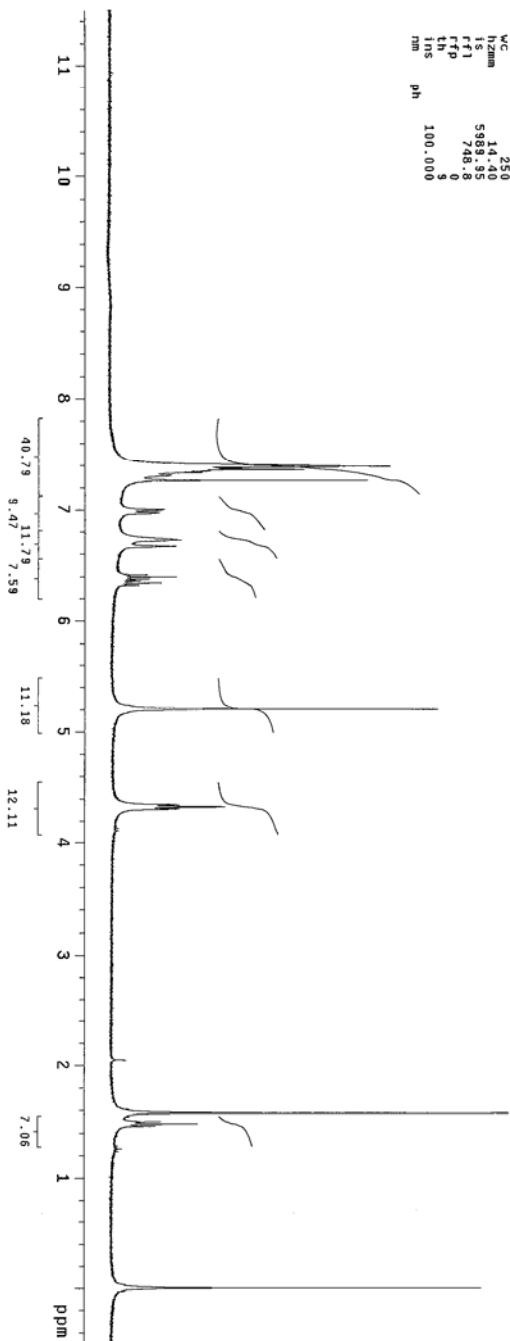

lv-273-91  
STANDARD 1H OBSERVE

exp3 stdin

SAMPLE DEC. & VT  
date Nov 28 2001 dfrq 300.069  
solvent cdcl3 dn H1  
file /hd2/export/h~ dpwr 30  
ome/chem2k/chem2k/~ dof 0  
date 02/21/04 dm nmh  
acq 121104 c  
sfrq 300.069 dmf PROCESSING 200  
tn H1  
at 1.998 wfile  
np 17984 proc ft  
sw 4500.5 fn not used  
td 2600  
tpwr 55 warr react  
pw 7.0 wbp procpior  
d1 1.000 wnt  
tof 0  
nt 256  
clock 0  
gain not used  
FLAGS  
11 n  
in n  
dp y  
SP DISPLAY 284.8  
WDW 213.8  
VS 1492  
SC 0  
WC 250  
hzmm 8.43  
ls 6103.26  
ftf 2938.1  
thp 2112.3  
ins 109.000  
aj cdc ph

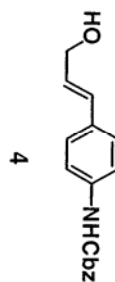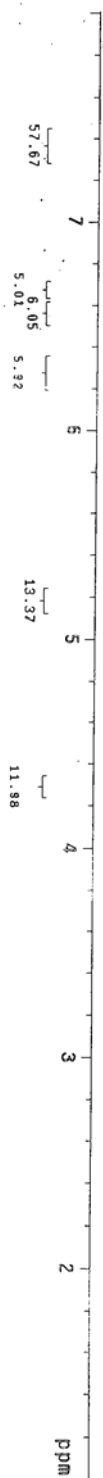

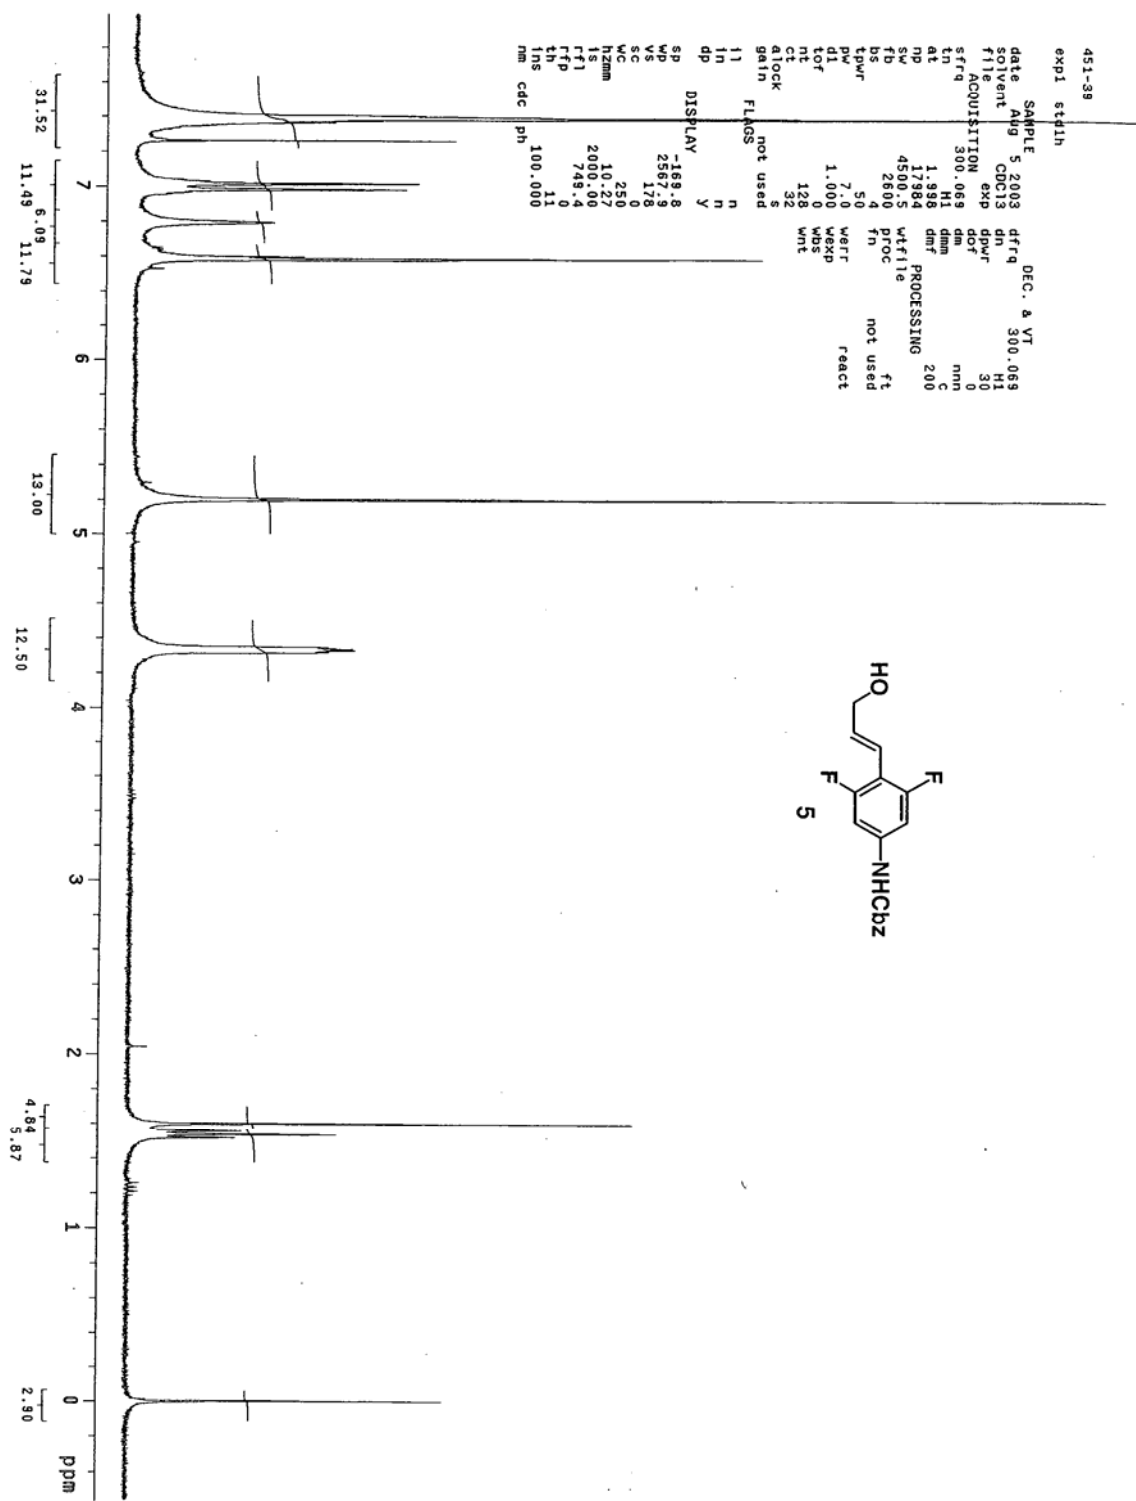

STANDARD 1H OBSERVE

exp1 std1h

SAMPLE DEC. & VT 300.069

date Apr 6 2001 dfrq 300.069

solvent Apr 6 2001 dfrq 300.069

file report/name/~/ dfrq 300.069

chem2/~/ dfrq 300.069

acq2/~/ dfrq 300.069

ACQUISITION 300.069 dmf 12240

PROCCESSING 12240

tn H1 wtfile ft

at 1.988 proc not used

np 1.988 ft

sp 45904 tn

fb 2600

bs 4 weff

tpwr 54 wexp

pw 6.7 wbs

dl 1.000 wnt

tof 250

ct 182

alock s

gain not used

flags n

in n

dp y

DISPLAY -150.3

sp 3600.8

wp 229

vs 0

sc 0

wc 250

nm 14.250

rfl 9550.05

rfl 749.1

th 0

ins 3

nm cdc ph 1.000

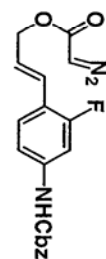

6

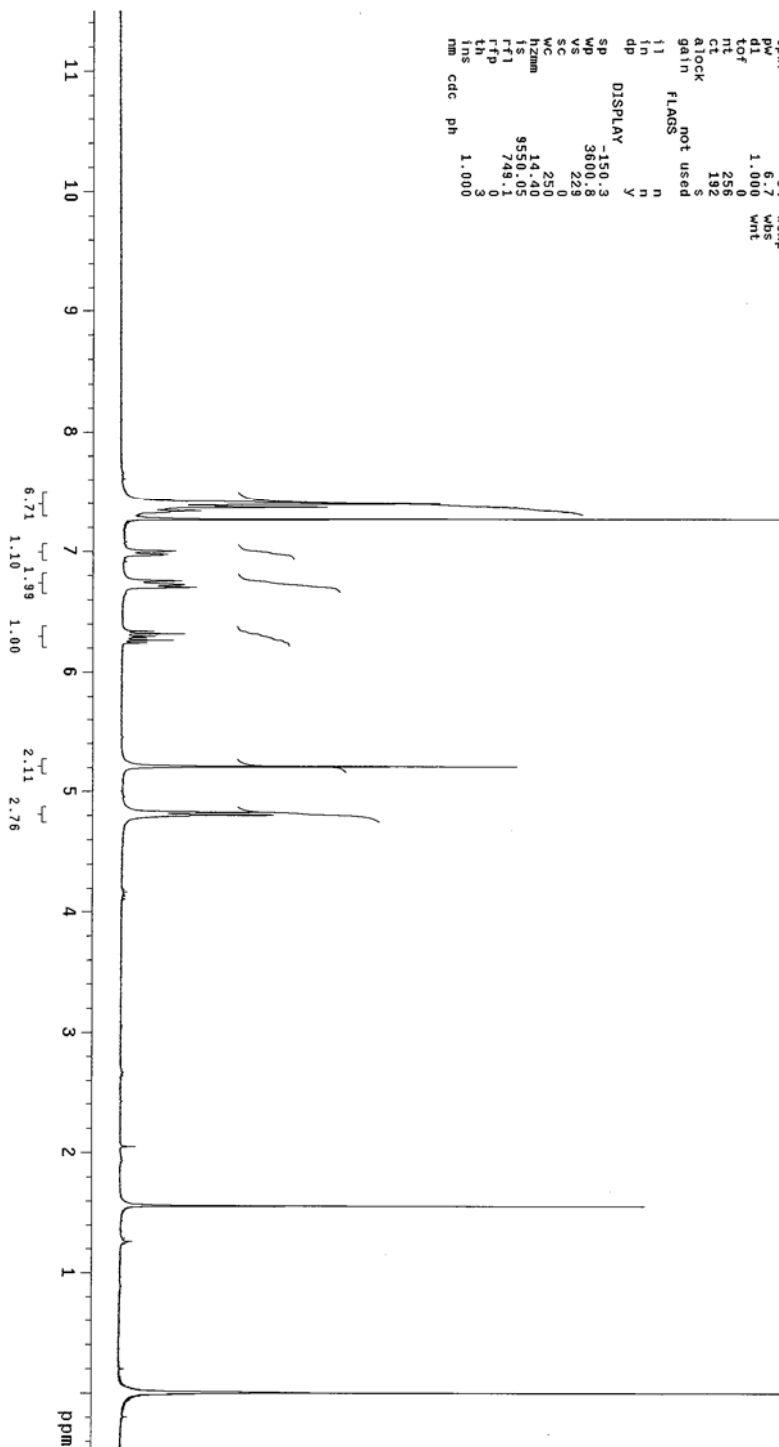

258-3

6

227-92  
STANDARD IN OBSERVE

exp1 std1h

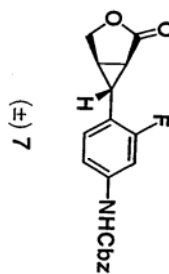

SAMPLE DEC. & VT  
date Mar 30 2001 dfrq 300.069  
event 128 dnt 30  
file export/003 dnt 30  
chem2k/spectra/Ad6~ dof 0  
m/237-92.fid dm nm  
ACQUISITION dmf PROCESSING 12240  
sfrq 300.069 dmf C  
in 128  
ac 1.886 wffile  
nd 1.788 proc ft  
sw 4500.5 fn not used  
fb 2600  
bs 4 warr react  
lpwr 54 wexp procpilot  
pw 1.000 wbs  
tm 0 wnt  
tof 32  
nt 32  
ct 32  
gain not used  
a1ock s  
flags not used  
i1 n  
in n  
dp y  
DISPLAY  
sp -150.3  
wp 3600.8  
vc 1111  
wc 1111  
vc 250  
hzmm 14.40  
ie 10943.14  
rfi 749.1  
rfp 0  
th 3  
tms 2.000  
at cdc ph

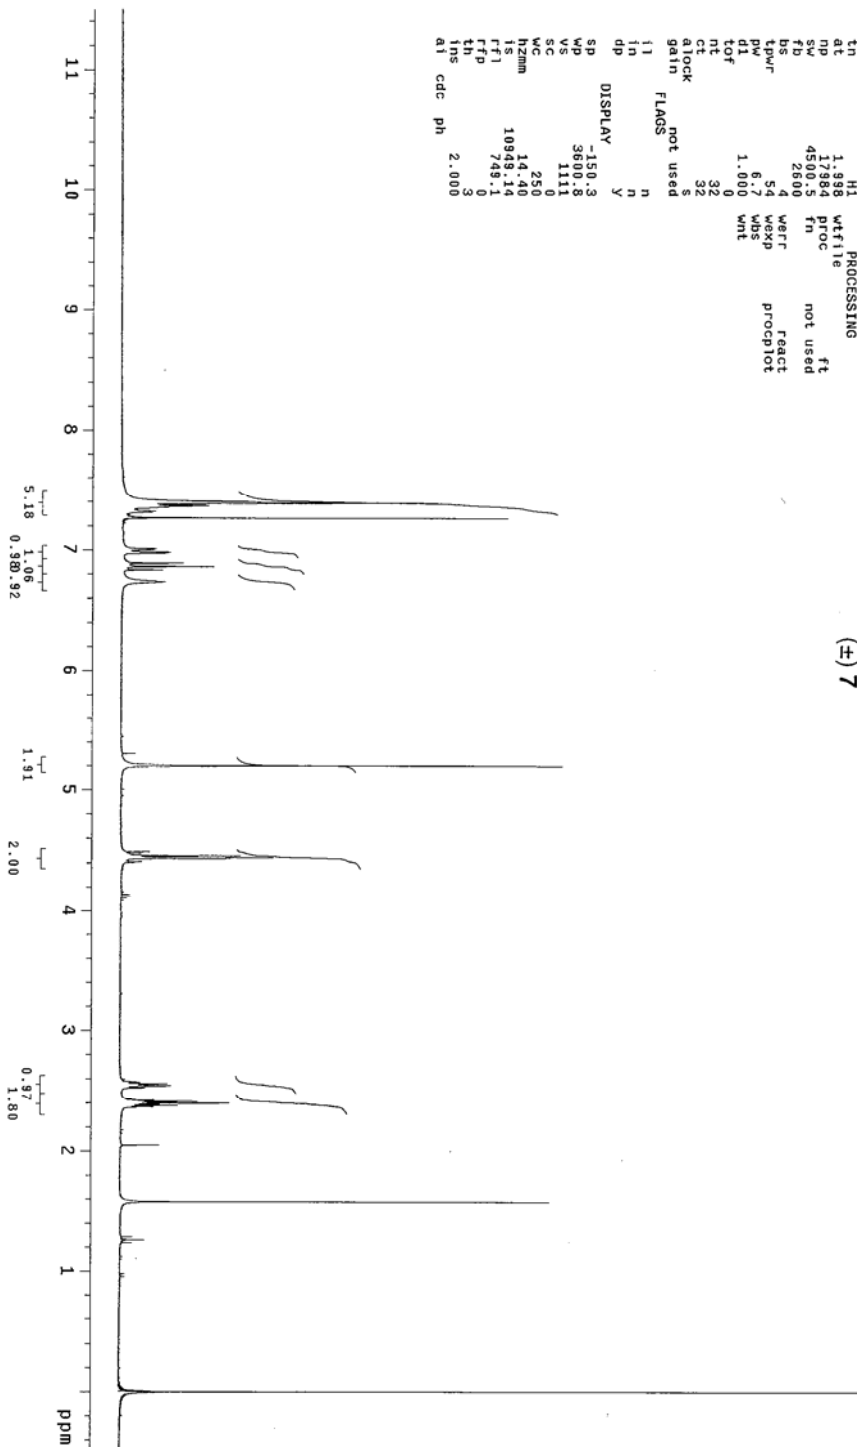



## STANDARD 1H OBSERVE

exp1 std1h

SAMPLE DEC. & VT 300.069  
date Jul 18 2001 dfrq 300.069  
solvent CDCl3 dn H1  
file /export/home/~  
chem2/7258-75.fid dm 36  
#258-75.fid dm nm  
ACQUISITION 12240  
sfrq 300.069 dmf  
in H1  
at 1.998 wtfile  
np 1.7864 proc ft  
no 4500.5 fn not used  
fs 2000.4  
bs 4 weff  
lpwr 54 wexp  
pw 6.7 wbs  
d1 1.000 wnt  
tof 0  
ct 128  
cs 64  
s 5  
a1ock s  
gain not used  
flags  
il n  
in n  
dp y  
DISPLAY -150.3  
sp 3600.8  
wp 109  
vs 0  
sc 0  
wc 250  
wzmm 14.20  
f1 13969.64  
rfl 749.7  
rfp 0  
th 20  
ins 2.000  
nm cdc ph

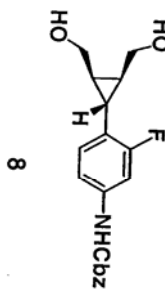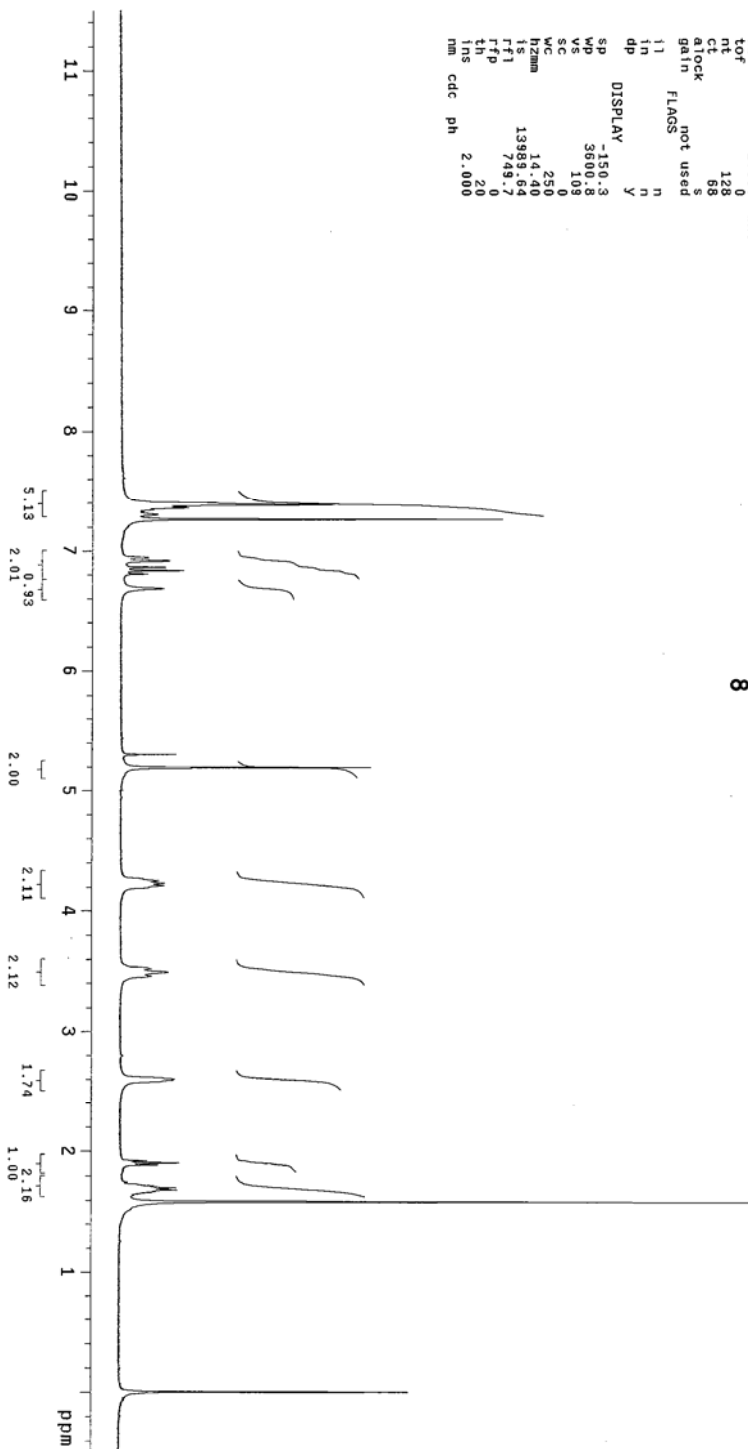

FW-273-94  
STANDARD 1H OBSERVE

expl std1h

SAMPLE DEC. & VT  
date Dec 7 2001 dfrq 300.063  
expnt 13 dnt 31  
file //export/hsa27394.dmr  
chem2k/spectra/rev~ dof 0  
a/273-94-diol.fid dm nm  
ACQUISITION 200  
sfrq 300.063 dmf  
tn 11  
nt 17884  
sw 4500.5 fm  
fb 2600  
bs 4 warr react  
tpwr 55 wexp procp1ot  
pw 7.0 wds  
nt 1.000 wnt  
ct 256  
nt 256  
a1ock not used  
gain s  
flags not used  
i1 n  
i1n n  
dp y  
DISPLAY  
sp -150.1  
vp 3600.8  
vc 1631  
wc 250  
bzmm 14.40  
is 14007.66  
rf1 2928.3  
rfp 2172.5  
th 3  
tms cdc ph 100.000  
at

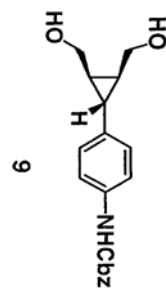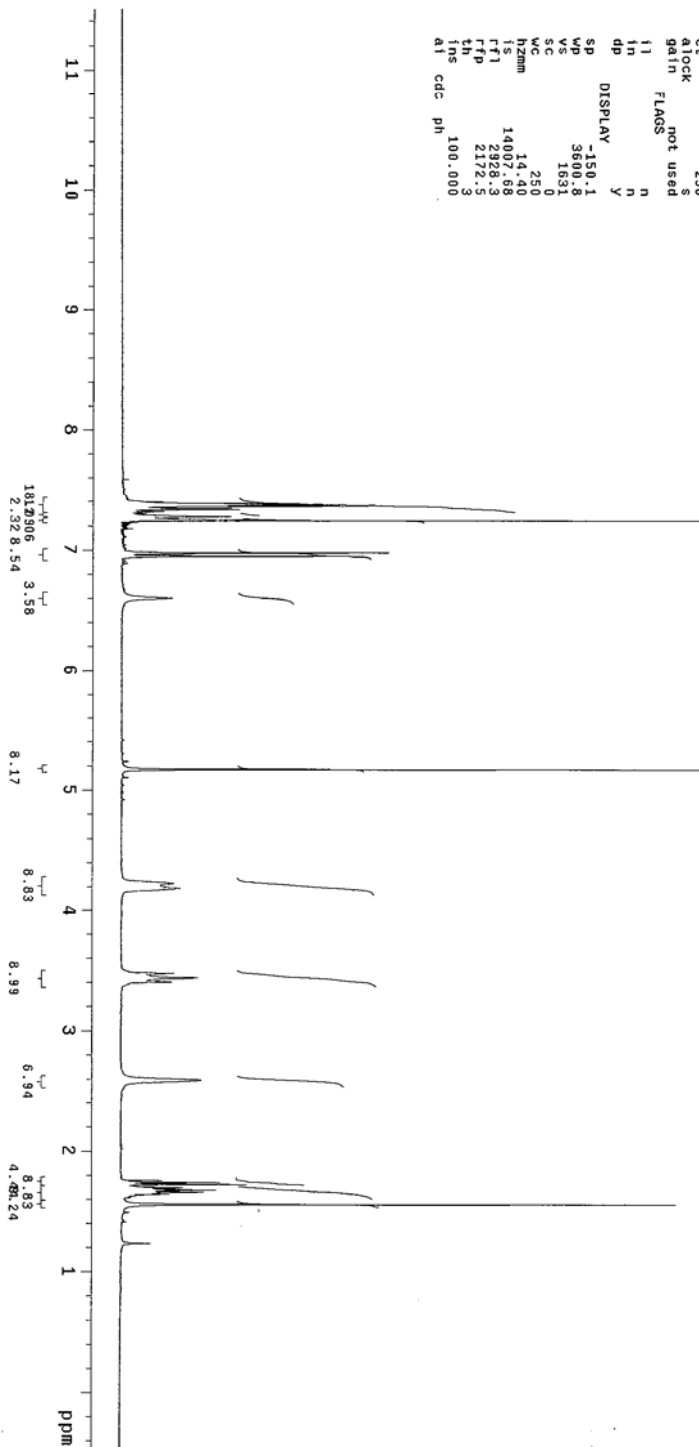

STANDARD 1H OBSERVE

expt stidh

SAMPLE DEC. & VT  
 date Oct 30 2003 dfrq 300.069  
 solvent CDC13 dn H1  
 file /export/home/~ dprw  
 chemk/spectra/p11~ do 30  
 nmr 10-118 mmc  
 ACQUISITION 300.069 dmf  
 srfq 300.069 dmf PROCESSING 200  
 tn H1 wifile  
 at 1.998 wifile ft  
 np 17984 proc not used  
 sw 4500.3 fn  
 tb 2800 warr  
 tpwr 50 wexp react  
 pw 7.0 wds  
 d1 1.000 wnt  
 tof 0  
 nt 32  
 ct 32  
 alock not used  
 gain flags  
 i1 n  
 in n  
 dp y  
 DISPLAY  
 sp 206.4  
 vp 268.7  
 vs 268.73  
 sc 1.0  
 wc 250  
 hzmm 10.66  
 is 4629.63  
 rfi 2928.1  
 rfp 2172.5  
 ins 100.000  
 nm cdc ph

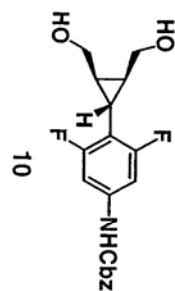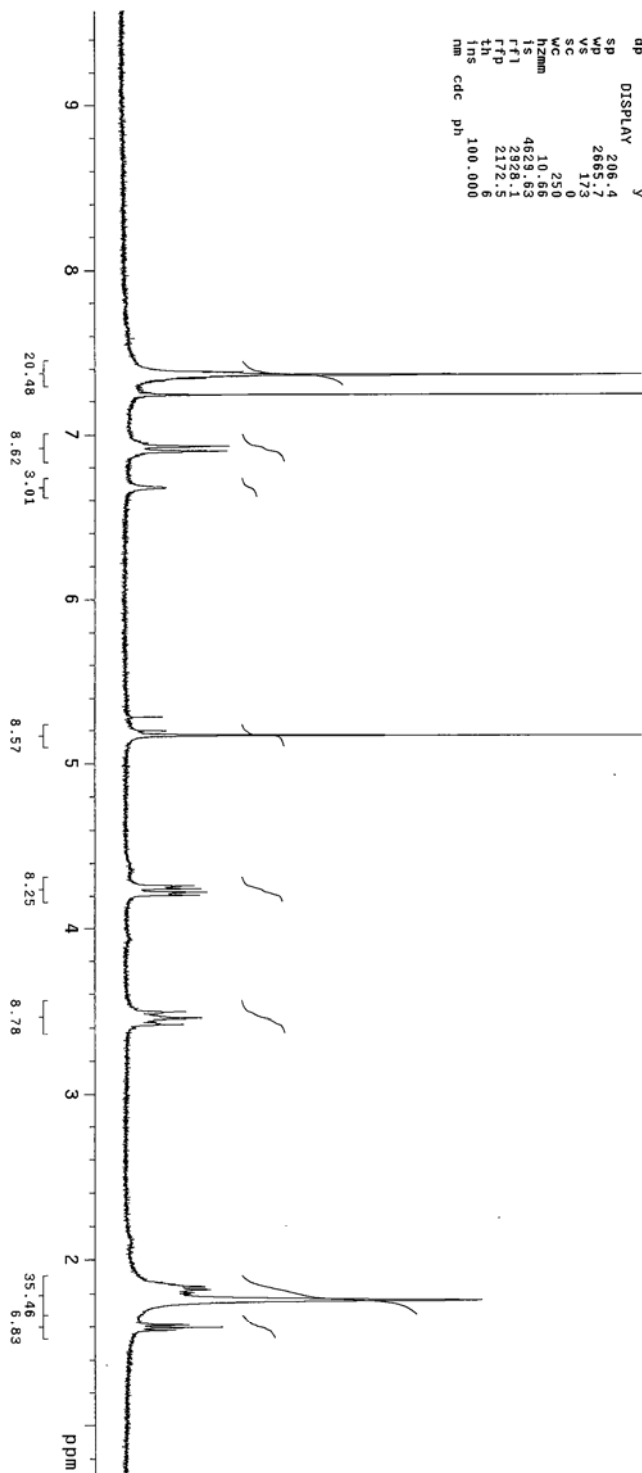

| exp1 | std1n |
|------|-------|
| 1    | 1     |
| 2    | 2     |
| 3    | 3     |
| 4    | 4     |
| 5    | 5     |
| 6    | 6     |
| 7    | 7     |
| 8    | 8     |
| 9    | 9     |
| 10   | 10    |
| 11   | 11    |
| 12   | 12    |
| 13   | 13    |
| 14   | 14    |
| 15   | 15    |
| 16   | 16    |
| 17   | 17    |
| 18   | 18    |
| 19   | 19    |
| 20   | 20    |
| 21   | 21    |
| 22   | 22    |
| 23   | 23    |
| 24   | 24    |
| 25   | 25    |
| 26   | 26    |
| 27   | 27    |
| 28   | 28    |
| 29   | 29    |
| 30   | 30    |
| 31   | 31    |
| 32   | 32    |
| 33   | 33    |
| 34   | 34    |
| 35   | 35    |
| 36   | 36    |
| 37   | 37    |
| 38   | 38    |
| 39   | 39    |
| 40   | 40    |
| 41   | 41    |
| 42   | 42    |
| 43   | 43    |
| 44   | 44    |
| 45   | 45    |
| 46   | 46    |
| 47   | 47    |
| 48   | 48    |
| 49   | 49    |
| 50   | 50    |
| 51   | 51    |
| 52   | 52    |
| 53   | 53    |
| 54   | 54    |
| 55   | 55    |
| 56   | 56    |
| 57   | 57    |
| 58   | 58    |
| 59   | 59    |
| 60   | 60    |
| 61   | 61    |
| 62   | 62    |
| 63   | 63    |
| 64   | 64    |
| 65   | 65    |
| 66   | 66    |
| 67   | 67    |
| 68   | 68    |
| 69   | 69    |
| 70   | 70    |
| 71   | 71    |
| 72   | 72    |
| 73   | 73    |
| 74   | 74    |
| 75   | 75    |
| 76   | 76    |
| 77   | 77    |
| 78   | 78    |
| 79   | 79    |
| 80   | 80    |
| 81   | 81    |
| 82   | 82    |
| 83   | 83    |
| 84   | 84    |
| 85   | 85    |
| 86   | 86    |
| 87   | 87    |
| 88   | 88    |
| 89   | 89    |
| 90   | 90    |
| 91   | 91    |
| 92   | 92    |
| 93   | 93    |
| 94   | 94    |
| 95   | 95    |
| 96   | 96    |
| 97   | 97    |
| 98   | 98    |
| 99   | 99    |
| 100  | 100   |

13

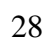

```

451-73
expt1 std1h
SAMPLE
date Sep 17 2003 dffq DEC. & VT 300.069
solvent CDCl3 dn H1
file /export/home/~dowr chem2/spect/451-73.dof 30
gwn/notes/451-73.dof 0
51-73h.fid dmf C
ACQUISITION 200
sffq 300.069 dmf PROCESSING
th H1 wfile ft
at 1.896 proc fn not used
nd 1.7864 fn
sv 4500.5
fb 2600 warf react
bs 50 wexp
lpwr 50 wds
pw 7.0 wnt
d1 1.000
tcf 0
rf 128
ct 172
alock s
gain not used
FLAGS
il n
in n
dp y
DISPLAY -150.3
sp 3600.8
vs 200
sc 0
wc 250
12um 14.40
is 2223.80
rfi 749.7
rfp 0
th 6
ins 3.000
nm ph

```

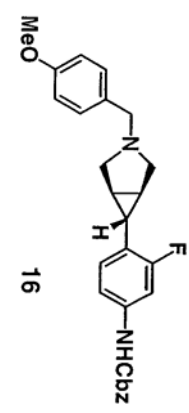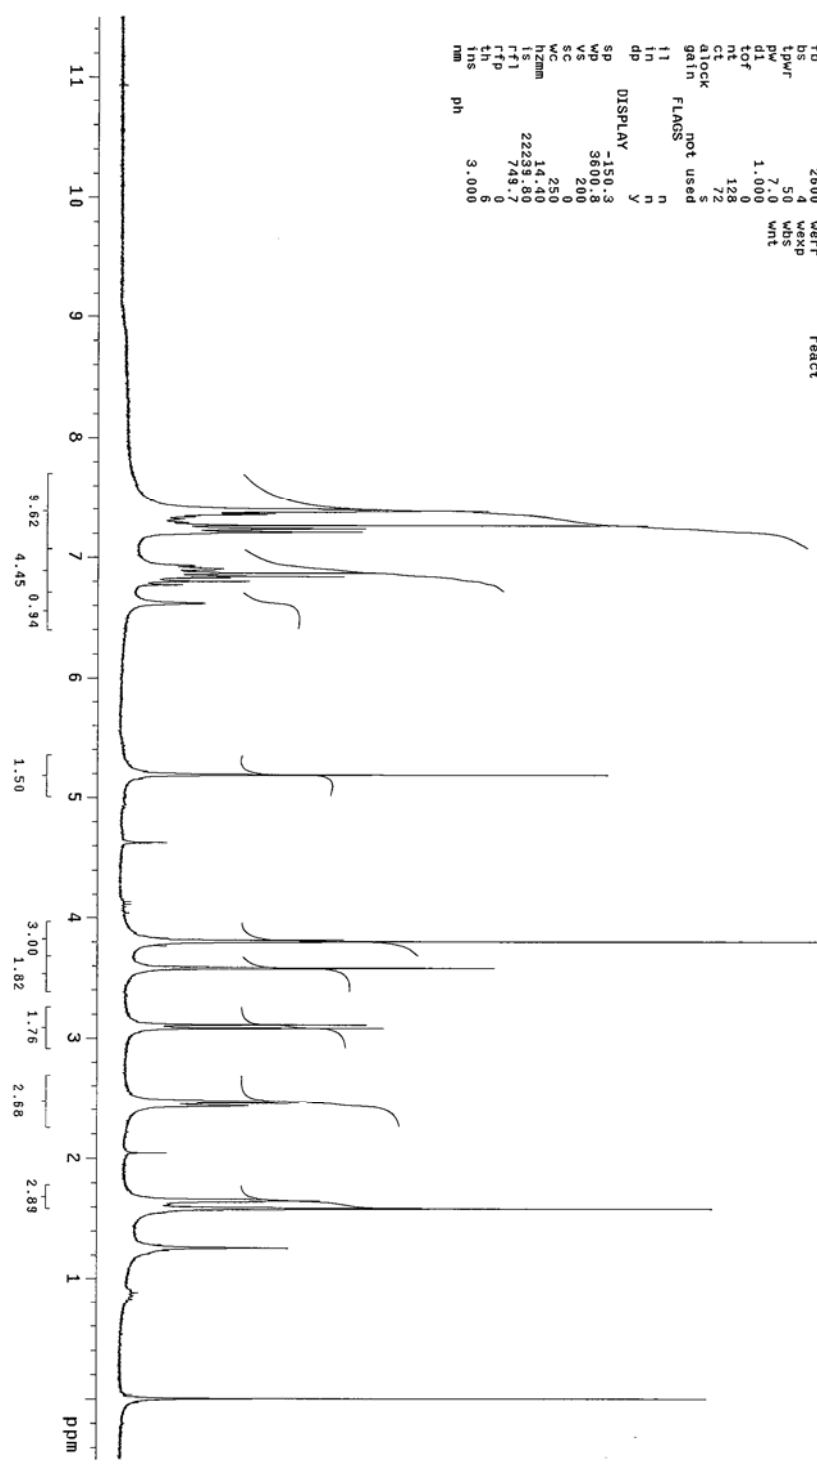

314-55  
STANDARD 1H OBSERVE

expt stdin

SAMPLE DEC. & VT  
date Mar 5 2002 dfrq 300.069  
time 11:38:31 an H1  
f1le export/bm/ dfr 30  
chem2/spectra/addr dof 0  
n/314-55.fid dm mn  
ACQUISITION c  
sfrq 300.069 dmf 12240  
in H1 wtfile PROCESSING  
at 1.388 POC ft  
nu 1.784 POC not used  
sw 4500.5 fn react  
fb 2600  
bs 4 weff procplot  
tpwr 54 wexp  
pw 6.7 wds  
ql 1.000 wnt  
nt 64  
ct 64  
aLOCK S  
gain not used  
11 FLAOS  
in n  
in n  
dp y  
DISPLAY  
sp -150.3  
wp 3800.8  
wv 1425  
wc 250  
h2mm 14.40  
ls 17945.47  
f1 747.7  
th 3  
ins 2.000  
al ph

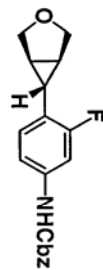

19

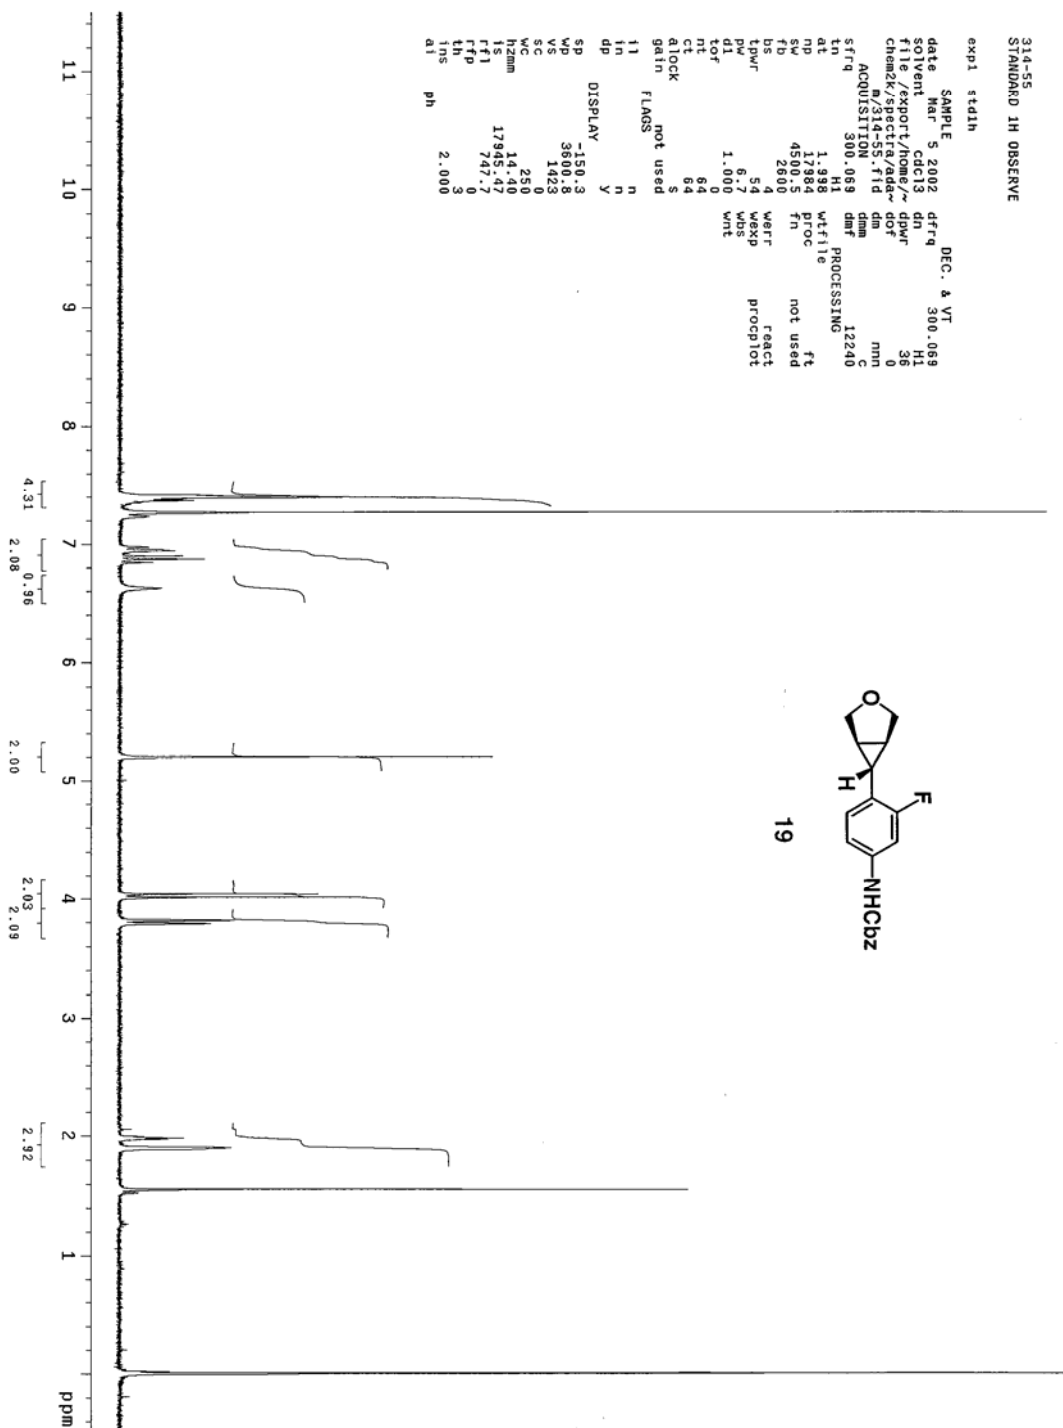

STANDARD 1H OBSERVE

exp3 std1h

SAMPLE DEC. & VT  
 date Apr 19 2001 dfrq 300.070  
 solvent DMSO d1 0.000  
 file ACQUISITION exp dprf 36  
 srfq 300.070 dm dof 0  
 tn H1 dnm nm  
 at 1.998 dnt 12240  
 dp 1.994 wtf file  
 rf 45000 proc ft  
 bs 8600 fn not used  
 tpwr 54  
 pv 6.7 weff  
 d1 1.000 wexp  
 tof 0 whs  
 nt 256 wnt  
 atlock 256 s  
 gain not used  
 flags  
 l1 n  
 in n  
 dp y  
 DISPLAY -150.3  
 sp wp 3600.8  
 ve 2110  
 sc 0  
 wc 250  
 hzmm 14.250  
 f1 35000.00  
 rf1 1494.7  
 rfp 750.2  
 th 20  
 ins 100.000  
 nm cdc ph

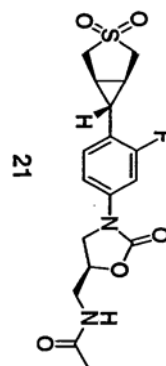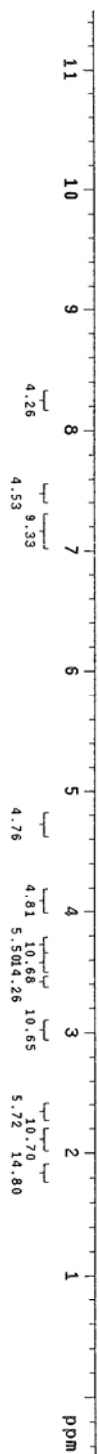

Supplement: Supplementary file 1 [file 5118676]
